# Supplementary material for: Separating the Wheat from the Chaff: The Use of Upstream Regulator Analysis to Identify True Differential Expression of Single Genes within Transcriptomic Datasets
Source: MDPI journal article supplement (doi:10.3390/ijms22126295), 2021-06-11
Supplement: s1 [file s1]

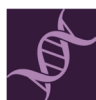

## Supplementary Material

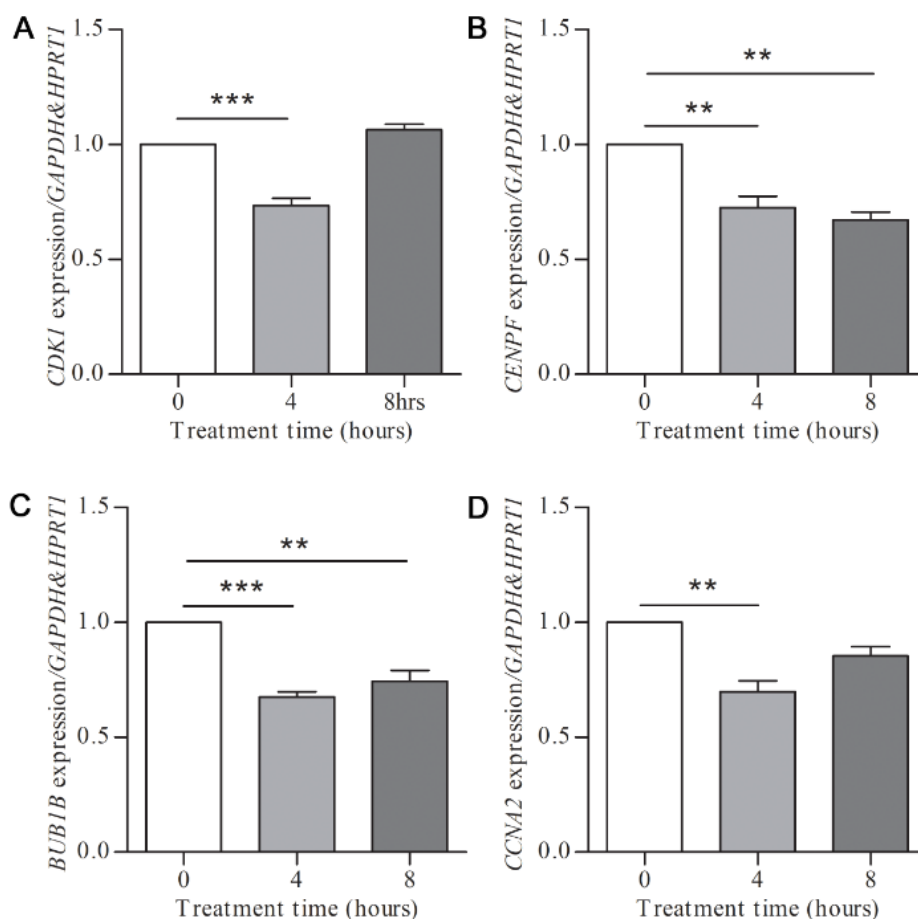

**Figure S1.** Validation of the effect of HU on four FOXM1 downstream genes. U87 glioblastoma cells were treated for 0, 4, and 8 h, and qRT-PCR was employed to determine gene expression of (A) cyclin-dependent kinase 1 (CDK1), (B) centromere protein F (CENPF), (C) BUB1 mitotic checkpoint serine/threonine kinase (BUB1), and (D) cyclin A2 (CCNA2). Statistical significance was measured by one-way ANOVA (nonparametric) with Tukey post hoc analysis (\*\*  $p < 0.01$ , \*\*\*  $p < 0.001$ , ns = not significant).

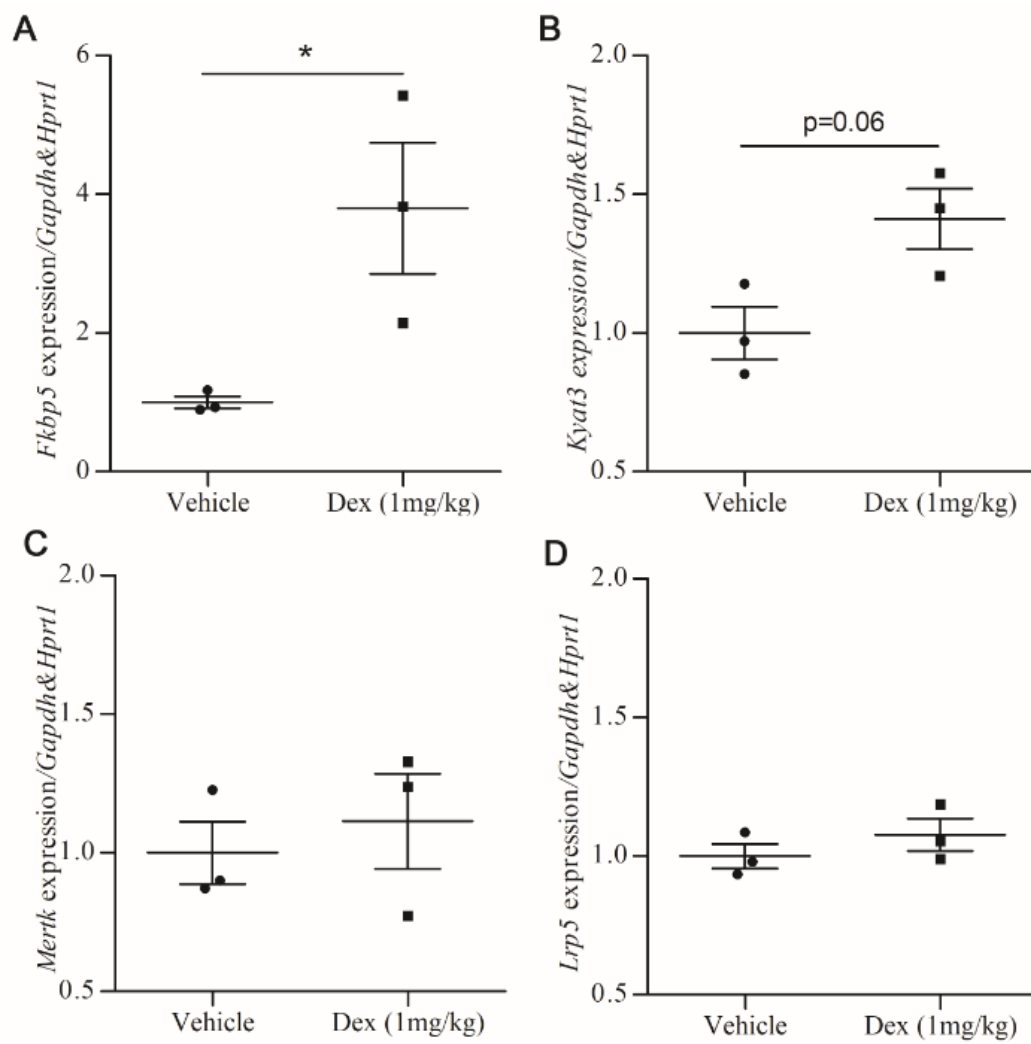

**Figure S2.** Validation of the effect of dexamethasone on three PPARD targets in vivo. Male C57BL6 mice were treated orally for 5 days with vehicle ( $n = 3$ ) or DEX (1 mg/kg) ( $n = 3$ ). Gene expression of PPARD targets was determined by qRT-PCR. (A) FKBP prolyl isomerase 5 (*Fkbp5*), (B) kynurenine aminotransferase 3 (*Kyat3*), (C) C-mer proto-oncogene tyrosine kinase (*Mertk*), (D) LDL receptor-related protein 5 (*Lrp5*).

**Table S1.** Mouse and human primers.

| <b>Mouse Primers Employed for qPCR</b> |                         |                           |
|----------------------------------------|-------------------------|---------------------------|
| <b>Gene Symbol</b>                     | <b>Forward Primer</b>   | <b>Reverse Primer</b>     |
| <i>Gapdh</i>                           | CGTCCCGTAGACAAAATGGT    | CTCCTGGAAGATGGTGATGG      |
| <i>Hprt1</i>                           | GCAAACCTTTGCATTCCCTGGTT | CAAGGGCATATCCAACAACA      |
| <i>Klf9</i>                            | GGAAACACGCCTCCGAAAAG    | AACGGAACTGCTTTTCCCCA      |
| <i>Fkbp5</i>                           | CCATGACTGAGCAGGGTGAA    | CCTCGTCACTAGTCCCCACT      |
| <i>Ilk</i>                             | TGGACAACACAGAGAACGACC   | GGGGTATCATCCCCACGATTC     |
| <i>Bcl2l1</i>                          | CCTTGGATCCAGGAGAACGG    | TCAGGAACCAGCGGTTGAAG      |
| <i>Pdk4</i>                            | CGTACTCCACTGCTCCAACA    | ACACCAGTCATCAGCTTCGG      |
| <i>Mfsd2a</i>                          | CCTTCACTGACCCTCTGGTG    | GAAGCCGTGTGAACTTTCCG      |
| <i>Mertk</i>                           | ACGTTGGTGGATACGTGCAT    | CTCTTCCCCTTCTCGGCAG       |
| <i>Lrp5</i>                            | GCCTTCATGGATGGGACCAA    | GCCCGTTCAATGCTATGCAG      |
| <i>Kyat3</i>                           | GTCCTCGGACTCTGCACTTC    | AGGATCCGCAGCCAACTTAG      |
| <b>Human Primers Employed for qPCR</b> |                         |                           |
| <b>Gene Symbol</b>                     | <b>Forward Primer</b>   | <b>Reverse Primer</b>     |
| <i>GAPDH</i>                           | GTTCGACAGTCAGCCGCATC    | AGTTAAAAGCAGCCCTGGTGA     |
| <i>HPRT1</i>                           | TGACACTGGCAAACCAATGCA   | GGTCCTTTTCACCAGCAAGCT     |
| <i>BUB1B</i>                           | CTTCTGGGATGGGTCCTTCTG   | GCTCTGAGGCAGCAATCTGT      |
| <i>FOXM1</i>                           | AGCGGCCACCCTACTCTTA     | CCCTGGGTCCAGTGGCTTAAA     |
| <i>CCNA2</i>                           | CGTGAAGATGCCCTGGCTTT    | AACCAGTCCACGAGGATAGC      |
| <i>CENPF</i>                           | CTGCGGGCAGTTTGAATTAG    | CTCTTGTAGGCAGCCCTTCT      |
| <i>CENPE</i>                           | TGAACTCACTTCGTGCTGACT   | ACTTCTGCATGCTTAACTAAATTCT |
| <i>PLK1</i>                            | AGTGTCAATGCCTCCAAGCC    | AGAGGATGAGGCGTGTTGAG      |
| <i>CCNB1</i>                           | CCTCTCCAAGCCCAATGGAA    | ACTTCCCGACCCAGTAGGTA      |
| <i>CDK1</i>                            | CGCGGAATAATAAGCCGGGA    | AGGAACCCCTTCTCTTCACT      |
